# Supplementary material for: Associations with visual acuity outcomes after 12 months of treatment in 9401 eyes with neovascular AMD
Source: HighWire-hosted journal article supplement (doi:10.1136/bmjophth-2022-001038), 2022-06-01
Supplement: bmjophth-2022-001038supp001_data_supplement.pdf [file bmjophth-2022-001038supp001_data_supplement.pdf]

Supplementary table 4: Number of eyes, median, categories and change

| Site                                   |
|----------------------------------------|
| Eyes (n)                               |
| Median LogMAR acuity at baseline (IQR) |
| Median LogMAR acuity at month 12 (IQR) |
| LogMAR ≤0.3 at month 12 (%)            |
| LogMAR 0.32 to 0.58 at month 12 (%)    |
| LogMAR 0.60 to 0.98 at month 12 (%)    |
| LogMAR ≥ 1.0 at month 12 (%)           |
| Median LogMAR change at month 12       |
| Vision gain of at least 0.1 LogMAR (%) |
| Vision gain of at least 0.2 LogMAR (%) |
| Vision gain of at least 0.3 LogMAR (%) |
| Vision loss of at least 0.1 LogMAR (%) |
| Vision loss of at least 0.2 LogMAR (%) |
| Vision loss of at least 0.3 LogMAR (%) |

ge in visual acuity at month 12 for each treatment centre

| Aggregate         | A                   | B                 |
|-------------------|---------------------|-------------------|
| 9,401             | 487                 | 587               |
| 0.50 (0.3, 0.8)   | 0.56 (0.4, 0.8)     | 0.50 (0.3, 0.74)  |
| 0.40 (0.22, 0.74) | 0.49 (0.3, 0.8)     | 0.30 (0.12, 0.6)  |
| 39.8              | 30.8                | 52.9              |
| 24.2              | 29.5                | 22.0              |
| 21.8              | 24.5                | 18.3              |
| 14.3              | 15.2                | 6.8               |
| -0.06 (-0.2, 0.1) | -0.08 (-0.24, 0.08) | -0.10 (-0.3, 0.0) |
| 40.9              | 43.9                | 56.0              |
| 26.9              | 31.4                | 38.6              |
| 17.2              | 20.3                | 27.1              |
| 23.6              | 22.4                | 14.2              |
| 14.4              | 13.7                | 7.3               |
| 9.5               | 9.1                 | 5.0               |

| C                  | D                   | E                   |
|--------------------|---------------------|---------------------|
| 345                | 467                 | 992                 |
| 0.54 (0.32, 0.82)  | 0.46 (0.26, 0.7)    | 0.52 (0.3, 0.8)     |
| 0.46 (0.2, 0.8)    | 0.40 (0.2, 0.6)     | 0.40 (0.2, 0.8)     |
| 41.2               | 44.1                | 41.7                |
| 16.4               | 27.4                | 19.5                |
| 24.5               | 20.1                | 24.7                |
| 17.8               | 8.4                 | 14.1                |
| -0.10 (-0.2, 0.08) | -0.04 (-0.22, 0.08) | -0.06 (-0.22, 0.06) |
| 46.2               | 39.4                | 43.0                |
| 30.4               | 26.5                | 27.6                |
| 17.8               | 20.1                | 15.6                |
| 20.9               | 20.8                | 20.1                |
| 15.0               | 12.4                | 11.4                |
| 10.9               | 6.8                 | 7.4                 |

| F                   | G                 | H                   |
|---------------------|-------------------|---------------------|
| 654                 | 1241              | 1071                |
| 0.56 (0.4, 0.8)     | 0.50 (0.3, 0.8)   | 0.46 (0.28, 0.7)    |
| 0.42 (0.24, 0.8)    | 0.40 (0.22, 0.7)  | 0.39 (0.2, 0.7)     |
| 36.7                | 39.9              | 42.6                |
| 27.1                | 24.6              | 25.3                |
| 22.7                | 20.3              | 20.4                |
| 13.5                | 15.2              | 11.7                |
| -0.10 (-0.26, 0.04) | -0.04 (-0.2, 0.1) | -0.04 (-0.18, 0.08) |
| 51.0                | 40.5              | 38.2                |
| 34.2                | 26.5              | 23.2                |
| 21.9                | 17.2              | 13.2                |
| 16.8                | 25.0              | 22.7                |
| 9.3                 | 14.9              | 13.0                |
| 5.6                 | 9.6               | 8.3                 |

| I                   | J                   | K                 |
|---------------------|---------------------|-------------------|
| 918                 | 837                 | 586               |
| 0.50 (0.3, 0.8)     | 0.54 (0.34, 0.8)    | 0.50 (0.28, 0.89) |
| 0.42 (0.24, 0.82)   | 0.40 (0.24, 0.7)    | 0.50 (0.22, 0.97) |
| 34.0                | 39.7                | 37.9              |
| 25.6                | 27.6                | 15.9              |
| 23.4                | 20.8                | 21.4              |
| 17.0                | 11.9                | 24.8              |
| -0.02 (-0.18, 0.14) | -0.08 (-0.26, 0.06) | 0.0 (-0.11, 0.14) |
| 35.3                | 46.0                | 27.5              |
| 23.3                | 31.6                | 16.9              |
| 15.0                | 21.2                | 10.8              |
| 29.4                | 19.9                | 29.8              |
| 19.8                | 11.0                | 20.2              |
| 13.4                | 6.9                 | 14.4              |

| L                | M                   |
|------------------|---------------------|
| 632              | 584                 |
| 0.41 (0.2, 0.7)  | 0.50 (0.32, 0.8)    |
| 0.41 (0.28, 0.8) | 0.42 (0.26, 0.7)    |
| 38.8             | 36.5                |
| 23.6             | 28.5                |
| 21.4             | 22.2                |
| 16.3             | 12.9                |
| 0.0 (-0.1, 0.18) | -0.08 (-0.22, 0.12) |
| 25.0             | 44.7                |
| 16.5             | 29.1                |
| 9.8              | 19.4                |
| 35.4             | 26.4                |
| 22.6             | 16.8                |
| 16.1             | 10.7                |
