# Supplementary material for: Associations with visual acuity outcomes after 12 months of treatment in 9401 eyes with neovascular AMD
Source: HighWire-hosted journal article supplement (doi:10.1136/bmjophth-2022-001038), 2022-06-01
Supplement: bmjophth-2022-001038supp002_data_supplement.pdf [file bmjophth-2022-001038supp002_data_supplement.pdf]

**Supplementary table 5: Number of first and second treated**

---

**Eyes (n)****Median LogMAR acuity at baseline (IQR)****Median month 12 LogMAR (IQR)****LogMAR  $\leq 0.3$  at month 12 (%)****LogMAR 0.32 to 0.58 at month 12 (%)****LogMAR 0.60 to 0.98 at month 12 (%)****LogMAR  $\geq 1.0$  at month 12 (%)****Median LogMAR change to M12 (IQR)**

---

eyes, median, categories and visual acuity change after 12 months of treat

| First eyes         | Second eyes      |
|--------------------|------------------|
| 6,909              | 2,492            |
| 0.56 (0.34, 0.82)  | 0.40 (0.22, 0.6) |
| 0.44 (0.24, 0.8)   | 0.32 (0.2, 0.6)  |
| 36.9               | 47.9             |
| 24.1               | 24.4             |
| 22.9               | 19.6             |
| 16.1               | 9.1              |
| -0.08 (-0.24, 0.1) | 0.0 (-0.14, 0.1) |
